# Supplementary material for: Bipolarity in a Collaborative Care Model Variation: Detection, Prevalence, and Outcomes
Source: Atypon-hosted journal article supplement (doi:10.1176/appi.ps.202000024), 2020-09-23
Supplement: appi.ps.202000024.ds001.pdf [file appi.ps.202000024.ds001.pdf]

**Bipolarity in Primary Care: Supplement***Demographic data for study sample compared to those excluded*

| Characteristic             | Study Sample<br>(N=641) |            | Excluded<br>(N=835) |            | p-value* |
|----------------------------|-------------------------|------------|---------------------|------------|----------|
|                            | N                       | %          | N                   | %          |          |
| Average Age (SD)           | Avg<br>43.8             | SD<br>16.4 | Avg<br>44.9         | SD<br>16.8 | 0.3      |
| Female                     | 435                     | 68         | 557                 | 67         | 0.7      |
| Race                       |                         |            |                     |            | 0.7      |
| White or Caucasian         | 612                     | 95         | 794                 | 95         |          |
| Other                      | 18                      | 3          | 29                  | 3          |          |
| Unknown or patient refused | 11                      | 2          | 12                  | 1          |          |
| Insurance Provider         |                         |            |                     |            | 0.6      |
| Medicare                   | 123                     | 19         | 180                 | 22         |          |
| Medicaid                   | 300                     | 47         | 391                 | 47         |          |
| Commercial                 | 205                     | 32         | 250                 | 30         |          |
| Other                      | 13                      | 2          | 14                  | 2          |          |

*\*from chi-squared tests comparing the study sample and those excluded**Further explanation for exclusion of patients who had previously received lamotrigine or lithium.*

Our data derive from two sources: the electronic health record (EHR), and manual chart review. Using the EHR we could access data on nearly 1500 patients. But the manual chart review was limited by funding available (stipends from a small grant). We therefore selected charts of patients who had never had lamotrigine or lithium. Why?

We have previously shown (Reference 5) that patients referred for psychiatric consultation, in a Collaborative Care Model (CoCM) program that is put in place after years of very limited access to psychiatry, have already had many psychotropic medications. The *average* number of prior psychiatric medications was 8, including a mean of 2.7 previous antidepressants.

We are preparing a follow-up paper which will focus on outcomes relative to *treatment* received, rather than diagnosis as in the present report. For that analysis, which was the original focus of our study, we chose to narrow the subject population to patients who per our EHR were receiving lamotrigine or lithium for the first time.

Why not study other medications as well? Other medications for bipolar disorders – e.g. dopamine antagonists such as quetiapine, risperidone, olanzapine, and aripiprazole -- are used in primary care for a wide variety of diagnoses. We confined our view to medications more specific to bipolarity.

3-page primary care questionnaire including non-manic bipolar markers

**Mental Health History** (will be scanned and placed in your record)

Name \_\_\_\_\_ Birthdate: \_\_\_\_\_ Today's date \_\_\_\_\_

Please take a few minutes to provide some basic information about you. These details may help us better understand the issues we'll be talking about shortly. *Thank you -*

| Please indicate whether any of your (blood) relatives have had any of these concerns: |                          |                          |                          |                          |                          |
|---------------------------------------------------------------------------------------|--------------------------|--------------------------|--------------------------|--------------------------|--------------------------|
|                                                                                       | Grandparents             | Parents                  | Aunts/Uncles             | Brothers/Sisters         | Children                 |
| Suicide                                                                               | <input type="checkbox"/> |
| Alcohol/Drug Problems                                                                 | <input type="checkbox"/> |
| Schizophrenia                                                                         | <input type="checkbox"/> |
| Depression Problems                                                                   | <input type="checkbox"/> |
| Manic, bipolar, schizoaffective                                                       | <input type="checkbox"/> |
| Anxiety problems                                                                      | <input type="checkbox"/> |
| ADD or ADHD                                                                           | <input type="checkbox"/> |

|                                                                                                   |                           |                 |               |                      |                                |                 |         |
|---------------------------------------------------------------------------------------------------|---------------------------|-----------------|---------------|----------------------|--------------------------------|-----------------|---------|
| How old were you when you <u>first</u> were depressed (if so)? ( <i>circle one</i> )              | As long as I can remember | Grade school    | before age 15 | 15-19                | 20-25                          | 25-30           | over 30 |
| How many episodes of depression have you had?                                                     | Zero                      | One             | 2-4           | 5-6                  | 10 or more                     |                 |         |
| Has an antidepressant you took worked at first, then stopped working?                             | No                        |                 |               | Yes                  |                                |                 |         |
| Ever had a problem with gambling?                                                                 | No                        |                 |               | Yes                  |                                |                 |         |
| Do you have a clear worsening of mood symptoms in the week before a menstrual cycle?              | No                        |                 |               | Yes                  |                                |                 |         |
| Did you have an episode after giving birth?                                                       | No                        | Within 6 months |               | Within 2 months      | Within 2 weeks                 |                 |         |
| Are your moods much different at different times of year?                                         | No effect of time of year |                 |               | Yes, seasonal shifts |                                |                 |         |
| When you are depressed, what happens to your energy?                                              | Nothing                   | It varies a lot |               | Very low             | Extremely low, can hardly move |                 |         |
| In episodes, have you lost contact with reality? (delusions, voices, people thought you were odd) | No                        |                 |               | Yes                  |                                |                 |         |
| How many antidepressants have you tried, if any?                                                  | None                      | 1               | 2             | 3                    | more than three                |                 |         |
| Have antidepressants ever caused: ( <i>circle all that apply</i> )                                | Excessive energy          | Severe insomnia |               | Agitation            | Irritability                   | Racing thoughts |         |

**PAST MENTAL HEALTH EXPERIENCE:**

Have you been previously diagnosed with any **mental health conditions**? Y N

If so, please list: \_\_\_\_\_

Have you been in **counseling or psychotherapy**—talk therapy? Y N

With whom? For how long? \_\_\_\_\_

Circle the treatments you have used in the past :

| <i>Antidepressants</i> | <i>Anti-anxiety</i> | <i>Mood</i>             | <i>Thinking</i>       | <i>Sleep</i>         |
|------------------------|---------------------|-------------------------|-----------------------|----------------------|
| fluoxetine/Prozac      | Valium              | lithium                 | risperidone/Risperdal | trazodone/Desyrel    |
| sertraline/Zoloft      | alprazolam/Xanax    | divalproex/Depakote     | paliperidone/Invega   | zolpidem/Ambien      |
| paroxetine/Paxil       | clonazepam/Klonopin | lamotrigine/Lamictal    | olanzapine/Zyprexa    | zaleplon/Sonata      |
| citalopram/Celexa      | temazepam/Restoril  | carbamazepine/Tegretol  | quetiapine/Seroquel   | eszopiclone/Lunesta  |
| escitalopram/Lexapro   | Librium             | oxcarbazepine/Trileptal | ziprasidone/Geodon    | amytriptiline/Elavil |
| bupropion/Wellbutrin   | lorazepam/Ativan    |                         | aripiprazole/Abilify  | prazosin/minipress   |
| venlafaxine/Effexor    | clonidine/Catapres  |                         | lurasidone/Latuda     |                      |
| mirtazapine/Remeron    |                     |                         | haloperidol/Haldol    |                      |
| duloxetine/Cymbalta    |                     |                         | perphenazine/Trilafon |                      |

| <i>For ADD/ADHD</i>     | <i>For tension or anxiety</i> | <i>Over-the-counter</i>               |
|-------------------------|-------------------------------|---------------------------------------|
| methylphenidate/Ritalin | prazosin                      | St. John’s Wort                       |
| d-amphetamine/Adderal   | diphenhydramine/Benadryl      | Fish Oil /omega-3s                    |
| Concerta                | hydroxyzine/Vistaril          | tryptophan                            |
| Vyvanse                 | cyclobenzapine/Flexeril       | melatonin                             |
| guanfacine/Tenex        | gabapentin/Neurontin          | Folic acid, L-methylfolate, or Deplin |
| clonidine               |                               | vitamin D                             |

| <i>Devices</i>     | <i>Physical activities for health or treatment</i> |               |                          |
|--------------------|----------------------------------------------------|---------------|--------------------------|
| light box          | FitBit                                             | pool exercise | Yoga                     |
| dawn simulator     | pedometer                                          | lap swimming  | Pilates                  |
| Alpha-Stim         | exercise bike                                      | walking       | Zoomba                   |
| rTMS               | step/stair-master                                  | running       | dance (jazz, swing, etc) |
| Electrotherapy/ECT | elliptical                                         | biking        | Tai Chi                  |
|                    | weight lifting                                     |               | personal trainer         |

For medications that had a clear effect, **very helpful or very bad**, can you remember...

**Medication**      **Max. dose**      **Took for how long?**      **Helpful?**      **Side effects?**

---



---



---



---

**TREATMENTS YOU USE NOW BESIDES PRESCRIPTION MEDICATIONS**

| Physical activities, if any<br>(minutes per day or week) | Dietary supplements, vitamins,<br>or over-the-counter medications, if any |
|----------------------------------------------------------|---------------------------------------------------------------------------|
| _____                                                    | _____                                                                     |
| _____                                                    | _____                                                                     |
| _____                                                    | _____                                                                     |

**ALCOHOL, MARIJUANA, CAFFEINE, AND OTHER STUFF**

Please describe your use (amount daily, weekly etc.) of:

Alcohol\_\_\_\_\_ Marijuana \_\_\_\_\_ Caffeine\_\_\_\_\_

Tobacco \_\_\_\_\_ ; former user? Y / N when quit? \_\_\_\_\_

Other recreational drugs? \_\_\_\_\_

Have you received any treatment for substance use disorders? Y / N

**SOCIAL HISTORY**

Your occupation or daytime activities \_\_\_\_\_

Means of financial support \_\_\_\_\_

Years of school completed \_\_\_\_\_

Military experience \_\_\_\_\_

Legal difficulties? \_\_\_\_\_

Your living situation \_\_\_\_\_

Significant other? \_\_\_\_\_

Children? \_\_\_\_\_

Access to firearms? \_\_\_\_\_

*In your life*, have you ever had any experience that was so frightening, horrible, or upsetting that, in the past month, you: (circle Yes or No)

1. Have had nightmares about it or thought about it when you did not want to?

YES / NO

2. Tried hard not to think about it or went out of your way to avoid situations that reminded you of it?

YES / NO

3. Were constantly on guard, watchful, or easily startled?

YES / NO

4. Felt numb or detached from others, activities, or your surroundings?

YES / NO
